# Supplementary material for: Immune profiling of uveal melanoma identifies a potential signature associated with response to immunotherapy
Source: PubMed Central journal article supplement — J Immunother Cancer. 2020 Nov 17;8(2):e000960. doi: 10.1136/jitc-2020-000960 (PMC7674090; doi:10.1136/jitc-2020-000960), 2020-11-17
Supplement: jitc-2020-000960supp001.pdf [file jitc-2020-000960supp001.pdf]

**Supplementary Table S1. Characteristics of primary uveal melanoma tumors in this study**

| Patient # | Tumor Size (High & Diameter)                                                                     | Cell Type                                  | Presence of closed vascular loops & Ciliary body involvement                                                                                                                                                                    | Cytogenetic /GEP                 | GNAQ/GNA1 1 |
|-----------|--------------------------------------------------------------------------------------------------|--------------------------------------------|---------------------------------------------------------------------------------------------------------------------------------------------------------------------------------------------------------------------------------|----------------------------------|-------------|
| 1         | 18 x 11 x 6 mm in height                                                                         | Spindled B type                            | The tumor is loosely attached to the sclera with a loosely adherent retina over the surface of the tumor.<br>Extending to involve the ciliary body.<br>The tumor invades nearly full thickness sclera, in a perineural pattern. | Not tested                       | Not tested  |
| 2         | 13 mm base, 5 mm height                                                                          | Spindled type                              | Tumor invades majority of sclera in perivascular patter.                                                                                                                                                                        | Class 1 (subclass not performed) | Not tested  |
| 3         | 13 mm base, 7.0 mm height                                                                        | Mixed spindled and epithelioid cell types. | Vortex vein invasion present; tumor extends extraocularly in vortex vein                                                                                                                                                        | Class 2                          | Not tested  |
| 4         | 20 mm base<br>9 mm height (beginning 6.0 mm from the limbus).                                    | Epithelioid cell type                      | Focal Choroidal invasion present.<br>Tumor surrounds optic nerve.                                                                                                                                                               | Class 1B                         | GNAQ Q209L  |
| 5         | 18.0 mm base x 12.0 mm height, 6.0 mm from the optic nerve and does not involve the ciliary body | Spindled type                              | Tumor arises in the choroidal region.<br>Vortex veins, negative for tumor.<br>Optic nerve, negative for tumor.<br>Scleral invasion: absent                                                                                      | Class 1A                         | Not tested  |

|    |                              |                                            |                                                                                                                                                                                                                                                   |          |            |
|----|------------------------------|--------------------------------------------|---------------------------------------------------------------------------------------------------------------------------------------------------------------------------------------------------------------------------------------------------|----------|------------|
| 6  | 12 x 10 mm base, 8 mm height | Spindled type                              | Tumor involves the ciliary body and the choroid.<br>Minimal scleral invasion.<br>The tumor does not involve the canal of schlemm.                                                                                                                 | Class 2  | Not tested |
| 7  | 18.0 mm base, 4 mm height    | Mixed spindled and epithelioid cell types. | The tumor in the extraocular space near the conjunctiva is entirely covered by conjunctiva/soft tissue ( margins negative).<br>Extraocular extension present.<br>Tumor invades sclera and canal of schlemm, extending to subconjunctival surface. | Class 2  | Not tested |
| 8  | 20 mm base x 10 mm height    | Mixed spindled and epithelioid cell types. | Tumor involving choroid and ciliary body with focal extension onto iris.<br>Choroidal invasion present.                                                                                                                                           | Class 1B | Not tested |
| 9  | 12 mm base x 6 mm height     | Spindled type                              | Scleral invasion present in perivasuclar pattern.<br>Extraocular extension is not identified.<br>Vortex veins and optic nerve, negative for tumor                                                                                                 | Class 1B | Not tested |
| 10 | 15 mm base x 11mm height     | Mixed spindled and epithelioid cell types. | Scleral invasion: absent.<br>Vortex veins: negative for tumor<br>Optic nerve: negative for tumor                                                                                                                                                  | Class 2  | Not tested |

|    |                               |                                            |                                                                                                                                                                                                                                                                                              |            |                                              |
|----|-------------------------------|--------------------------------------------|----------------------------------------------------------------------------------------------------------------------------------------------------------------------------------------------------------------------------------------------------------------------------------------------|------------|----------------------------------------------|
| 11 | 9 mm base and 12 mm height    | Mixed spindled and epithelioid cell types. | Invades ciliary body and iris extending into the anterior chamber. Scleral invasion: Present with probable involvement of the canal of schlemm.<br>Extraocular extension: Present, 1 mm focus.<br>Optic nerve and optic nerve margin, negative for tumor<br>Vortex veins, negative for tumor | Class 2    | Not tested                                   |
| 12 | 14 mm base, 6 mm height       | Spindled type                              | Superficial scleral invasion present. optic nerve invasion is not identified.<br>vortex vein is negative for tumor. extraocular extension is not identified.                                                                                                                                 | Not tested | wt for <i>GNAQ</i> ; <i>GNA11</i> not tested |
| 13 | Primary tumor #1<br>Size: N/A | Spindled type                              | enucleated left globe<br>TISSUE FROM LEFT ORBIT –<br>Multiple black, red, soft tissue fragments without discernible normal tissue ( 3 x 2 x 0.3 cm in aggregate)                                                                                                                             | Class 1B   | <i>GNAQ</i> Q209L                            |

|    |                                      |                       |                                                                                                                                                                                                                                                                                                                                                                                                                                                                                                                                                                                                                                                                                                                   |          |            |
|----|--------------------------------------|-----------------------|-------------------------------------------------------------------------------------------------------------------------------------------------------------------------------------------------------------------------------------------------------------------------------------------------------------------------------------------------------------------------------------------------------------------------------------------------------------------------------------------------------------------------------------------------------------------------------------------------------------------------------------------------------------------------------------------------------------------|----------|------------|
|    | Primary tumor #2<br>5 x 4.6 x 3.1 cm | Spindled B morphology | Recurrent melanoma<br>LEFT ORBITAL CONTENTS, UVEAL<br>MELANOMA, TIL PROTOCOL – A<br>light tan skin ellipse (6.7 x 4 cm)<br>that contains<br>both eyelids with eyelashes on the<br>superior. Attached to the skin is a<br>portion of tan and brown soft<br>tissue (5.7 x 5.2 x 3.8 cm).<br>Serial sections reveal a mass (5 x<br>4.6 x 3.1 cm) underlying the skin,<br>that's friable, necrotic black and<br>soft. The mass<br>is grossly located 0.6 cm from the<br>skin, 1 cm from lateral, 0.8 cm from<br>medial and 0.3 cm from the<br>resection margins. There<br>are areas where the mass appears<br>to extend into the adjacent adipose<br>tissue. 85% of the specimen was<br>provided for TIL<br>protocol. |          |            |
| 14 | 11 mm base, 10 mm<br>height          | Spindled B type       | Superficial scleral invasion is<br>present.<br>The tumor is confined to the globe,<br>extraocular extension is not<br>identified.<br>Vortex vein invasion is not<br>identified.<br>The optic nerve is uninvolved                                                                                                                                                                                                                                                                                                                                                                                                                                                                                                  | Class 1B | Not tested |

|    |                           |                                            |                                                                                                                                                                                                      |          |                                                      |
|----|---------------------------|--------------------------------------------|------------------------------------------------------------------------------------------------------------------------------------------------------------------------------------------------------|----------|------------------------------------------------------|
| 15 | 14 mm base X 5 mm height  | Mixed spindled and epithelioid cell types. | Scleral invasion present.<br>Extraocular extension negative.<br>Vortex veins negative for tumor.<br>Optic nerve negative for tumor.                                                                  | Class 2  | Not tested                                           |
| 16 | 22 mm base x 12 mm height | Epithelioid cell type                      | Tumor invades ciliary body and sclera.<br>Vortex veins, negative for tumor<br>Optic nerve, negative for invasion.                                                                                    | Class 2  | Not tested                                           |
| 17 | 16 mm base X 13 mm height | Mixed spindled and epithelioid cell types. | Vortex veins negative for tumor<br>Optic nerve negative for tumor<br>Superficial invasion of sclera<br>Extraocular extension, absent                                                                 | Class 1A | <i>GNA11</i> Q209L                                   |
| 18 | 15 mm base x 11 mm height | Mixed spindled and epithelioid cell types. | Extraocular extension present (approx. 3 mm focus).<br>Tumor invades the sclera.<br>Vascular invasion: present.<br>Optic nerve, negative for tumor                                                   | Class 2  | <i>GNAQ</i> wt;<br><i>GNA11</i> testing unsuccessful |
| 19 | 18 mm base, 12 mm height  | Mixed spindled and epithelioid cell types. | Sclera and ciliary body invasion present.<br>Extraocular extension absent.<br>Vortex veins negative for tumor<br>Optic nerve negative for tumor                                                      | Class 1A | <i>GNAQ</i> Q209P                                    |
| 20 | 15 mm base, 5 mm height   | Mixed spindled and epithelioid cell types. | Scleral invasion present<br>Extraocular extension, focal < 0.1 cm<br>Optic nerve evaluation, pending level review.<br>Optic nerve margin negative for tumor.<br>Vortex vein, no definitive invasion. | Class 2  | <i>GNAQ</i> Q209P                                    |

|    |                                 |                                            |                                                                                                                                                                                                                                                                                                       |          |                                                 |
|----|---------------------------------|--------------------------------------------|-------------------------------------------------------------------------------------------------------------------------------------------------------------------------------------------------------------------------------------------------------------------------------------------------------|----------|-------------------------------------------------|
| 21 | (12 x 13 mm) base x 7 mm height | Spindled B type                            | Scleral invasion present<br>Intravascular tumor present within sclera<br>Extraocular extension of vortex veins, negative for tumor.<br>Optic nerve, negative for tumor.                                                                                                                               | Class 2  | <i>GNA11</i> Q209L                              |
| 22 | 25 mm base, 10 mm height        | Spindled B type                            | Tumor involving the choroid and ciliary body with extension into the trabecular meshwork.<br>Superficial scleral invasion is present.<br>Extraocular extension is not identified.<br>Vortex veins are negative for tumor.<br>Optic nerve is negative for tumor.<br>The overlying retina is atrophied. | Class 1A | <i>GNA11</i> Q209L; <i>RET</i> V648I            |
| 23 | 18 mm base x 11 mm in height    | Mixed spindled and epithelioid cell types. | Gross extraocular extension present.<br>Tumor extends to involve ciliary body.<br>Tumor involves vortex veins.<br>Optic nerve and optic nerve, margin negative for tumor.                                                                                                                             | Class 2  | wt for <i>GNAQ</i> ;<br><i>GNA11</i> not tested |
| 24 | 11 mm base, 3 mm height         | Spindled type                              | Superficial, sclera and optic nerve invasion present.<br>Extraocular extension is not identified<br>Vortex veins negative for invasion                                                                                                                                                                | Class 1A | <i>GNA11</i> Q209L                              |

|    |                              |                                            |                                                                                                                                                                                                                                 |         |                                                 |
|----|------------------------------|--------------------------------------------|---------------------------------------------------------------------------------------------------------------------------------------------------------------------------------------------------------------------------------|---------|-------------------------------------------------|
| 25 | 11.0 mm base x 5.0 mm height | Mixed spindled and epithelioid cell types. | Tumor invades ciliary body and iris.<br>Tumor invades sclera near full thickness in a perivascular pattern<br>Extraocular extension is not identified.<br>Vortex veins, negative for tumor.<br>Optic nerve, negative for tumor. | Class 2 | Not tested                                      |
| 26 | 12 mm base x 20 mm height    | Mixed spindled and epithelioid cell types. | Scleral invasion with extraocular extension present, 10 mm focus, posterior orbital<br>Optic nerve margin, negative for tumor<br>Skeletal muscle, negative for tumor.                                                           | Class 2 | wt for <i>GNAQ</i> ;<br><i>GNA11</i> not tested |
