# Supplementary material for: Immune profiling of uveal melanoma identifies a potential signature associated with response to immunotherapy
Source: PubMed Central journal article supplement — J Immunother Cancer. 2020 Nov 17;8(2):e000960. doi: 10.1136/jitc-2020-000960 (PMC7674090; doi:10.1136/jitc-2020-000960), 2020-11-17
Supplement: jitc-2020-000960supp002.pdf [file jitc-2020-000960supp002.pdf]

Supplementary Table S2. Characteristics of uveal melanoma metastatic tumors under systematic therapy

| Patient | Tissue collected | Treatment Naïve or S/P treatment | Anatomic location      | Prior Treatment                                | Category      |
|---------|------------------|----------------------------------|------------------------|------------------------------------------------|---------------|
| 1       | 3/12/2013        | Treatment Naïve                  | liver                  |                                                |               |
|         | 5/22/2013        | Treatment Naïve                  | skin scalp             |                                                |               |
|         | 9/18/2013        | S/P treatment                    | skin chest             | Ipilimumab 10 mg/kg                            | IMMUNOTHERAPY |
| 2       | 3/13/2013        | Treatment Naïve                  | liver                  |                                                |               |
|         | 4/4/2013         | Treatment Naïve                  | liver                  |                                                |               |
|         | 1/29/2014        | S/P treatment                    | left flank soft tissue | Ipilimumab 10 mg/kg                            | IMMUNOTHERAPY |
|         | 4/4/2014         | S/P treatment                    | liver                  | intratumoral autologous dendritic cell vaccine | IMMUNOTHERAPY |
| 3       | 10/24/2014       | Treatment Naïve                  | liver                  |                                                |               |
| 4       | 6/7/2013         | Treatment Naïve                  | liver                  |                                                |               |
| 5       | 7/3/2012         | Treatment Naïve                  | liver                  |                                                |               |
| 6       | 6/20/2014        | Treatment Naïve                  | liver                  |                                                |               |
|         | 6/26/2014        | Treatment Naïve                  | liver                  |                                                |               |
|         | 5/27/2015        | S/P treatment                    | liver                  | Ipilimumab 3 mg/kg + Temozolomide              | IMMUNOTHERAPY |
| 7       | 7/11/2014        | Treatment Naïve                  | liver                  |                                                |               |
| 8       | 9/5/2014         | Treatment Naïve                  | liver                  |                                                |               |
| 9       | 9/10/2014        | Treatment Naïve                  | liver                  |                                                |               |
| 10      | 11/5/2014        | Treatment Naïve                  | liver                  |                                                |               |
| 11      | 11/13/2014       | Treatment Naïve                  | liver                  |                                                |               |

|    |            |                 |                      |                                           |                                 |
|----|------------|-----------------|----------------------|-------------------------------------------|---------------------------------|
| 12 | 11/18/2014 | Treatment Naïve | liver                |                                           |                                 |
| 13 | 4/18/2014  | Treatment Naïve | liver                |                                           |                                 |
| 14 | 7/29/2014  | Treatment Naïve | liver                |                                           |                                 |
| 15 | 7/3/2014   | Treatment Naïve | liver                |                                           |                                 |
| 16 | 7/29/2013  | Treatment Naïve | liver                |                                           |                                 |
| 17 | 2/6/2013   | Treatment Naïve | lung                 |                                           |                                 |
|    | 3/19/2013  | Treatment Naïve | lung                 |                                           |                                 |
|    | 6/25/2014  | S/P treatment   | soft tissue          | Mekinist and Yttrium-90 radioembolization | LIVER DIRECTED THERAPY          |
|    | 6/29/2014  | S/P treatment   | epidural soft tissue | Mekinist and Yttrium-90 radioembolization | LIVER DIRECTED THERAPY          |
| 18 | 12/14/2011 | Treatment Naïve | lung                 |                                           |                                 |
|    | 1/24/2012  | Treatment Naïve | lung                 |                                           |                                 |
|    | 5/30/2014  | Treatment Naïve | lung                 |                                           |                                 |
| 19 | 3/24/2014  | Treatment Naïve | lung                 |                                           |                                 |
| 20 | 4/12/2013  | Treatment Naïve | soft tissue          |                                           |                                 |
|    | 1/13/2014  | S/P treatment   | abdomen              | arginine deaminase plus cisplatin         | ANTIMETABOLITE AND CHEMOTHERAPY |
|    | 6/5/2014   | S/P treatment   | abdomen              | crizotinib                                | TARGETED THERAPY                |
|    | 9/10/2014  | S/P treatment   | abdomen              | crizotinib plus trametinib                | TARGETED THERAPY                |
| 21 | 10/7/2014  | Treatment Naïve | soft tissue          |                                           |                                 |
| 22 | 4/4/2014   | Treatment Naïve | soft tissue          |                                           |                                 |
|    | 6/6/2014   | S/P treatment   | Subcutaneous         | trametinib                                | TARGETED THERAPY                |
|    | 11/17/2014 | S/P treatment   | Subcutaneous         | trametinib plus AKT inhibitor             | TARGETED THERAPY                |
|    | 12/1/2014  | S/P treatment   | Subcutaneous         | valproic acid                             | EPIGENETIC THERAPY              |
| 23 | 6/4/2014   | Treatment Naïve | scalp connective     |                                           |                                 |

|    |            |                 |                       |                                             |                        |
|----|------------|-----------------|-----------------------|---------------------------------------------|------------------------|
|    |            |                 | tissue                |                                             |                        |
|    | 3/12/2015  | S/P treatment   | skeletal tissue       | trametinib plus AKT inhibitor               | TARGETED THERAPY       |
| 24 | 1/14/2014  | S/P treatment   | liver                 | anti-PD-L1 (MEDI-4736)                      | IMMUNOTHERAPY          |
| 25 | 9/5/2014   | S/P treatment   | liver                 | Ipilimumab 10 mg/kg                         | IMMUNOTHERAPY          |
| 26 | 1/8/2014   | S/P treatment   | liver                 | Ipilimumab 10 mg/kg                         | IMMUNOTHERAPY          |
| 27 | 11/2/2015  | S/P treatment   | liver                 | microRNA                                    | EPIGENETIC THERAPY     |
| 28 | 9/3/2014   | S/P treatment   | lung                  | vorinostat                                  | EPIGENETIC THERAPY     |
|    | 10/13/2014 | S/P treatment   | lung                  | vorinostat                                  | EPIGENETIC THERAPY     |
| 29 | 1/24/2013  | S/P treatment   | per-hilar lymph node  | liver-directed therapy (bland embolization) | LIVER DIRECTED THERAPY |
|    | 1/24/2013  | S/P treatment   | skin/<br>Subcutaneous | liver-directed therapy (bland embolization) | LIVER DIRECTED THERAPY |
| 30 | 5/5/2015   | S/P treatment   | soft tissue           | trametinib plus AKT inhibitor               | TARGETED THERAPY       |
| 31 | 7/28/2014  | Treatment Naïve |                       |                                             |                        |
|    | 5/5/2015   | S/P treatment   | Lung                  | trametinib                                  | TARGETED THERAPY       |
