# Supplementary material for: Immune profiling of uveal melanoma identifies a potential signature associated with response to immunotherapy
Source: PubMed Central journal article supplement — J Immunother Cancer. 2020 Nov 17;8(2):e000960. doi: 10.1136/jitc-2020-000960 (PMC7674090; doi:10.1136/jitc-2020-000960), 2020-11-17
Supplement: jitc-2020-000960supp003.pdf [file jitc-2020-000960supp003.pdf]

**Supplementary Table S3. Characteristics of uveal melanoma patients treated with immunotherapy in NanoString analysis.**

| <i>Patient</i> | <i>DOR</i>                     | <i>PFS</i> | <i>Tumor change</i>              | <i>Overall response</i>                           |
|----------------|--------------------------------|------------|----------------------------------|---------------------------------------------------|
| 1              | 2.5 months                     | 2.5 months | Not calculated (motion artifact) | Responder based on pathologic findings at autopsy |
| 2              | 8 months                       | 8 months   | -34%                             | Partial Response per RECIST 1.1                   |
| 3              | 6 months                       | 6 months   | Not provided                     | Stable disease per RECIST 1.1                     |
| 4              | Not applicable (non-responder) | 3 months   | Not provided                     | Progression of disease per RECIST 1.1             |
| 5              | Not applicable (non-responder) | 4 months   | +26%                             | Progression of disease per RECIST 1.1             |
| 6              | Not applicable (non-responder) | 2.3 months | Not provided                     | Progression of disease per RECIST 1.1             |

Patient 1 = the Ipi + Nivo treated patient; Patient 2 = the 41BB + OX40 treated patient.

The 41BB + OX40 (patient #2) treated patient had 34% of target lesion reduction per RECIST 1.1 in liver and perisplenic tumors, qualifying this as a partial response. Duration of response and PFS were both 8 months.

The Ipi + Nivo (patient #1) treated patient had at least 7 liver tumors at baseline, and one measuring 10.2mm. However, his post-baseline MRI was compromised by motion artifact, so tumor measurements were not assessed. However, upon death (complications from septic endocarditis) an autopsy showed "minimal residual melanoma consisting of 5 subcentimeter nodules." In this regard, response was not assessed by formal radiographic criteria but rather by pathologic evaluation. Duration of response and PFS were 2.5 months.

The remaining 4 patients did not have uniform tumor assessments as they were not all treated at a singular location with available imaging. However, their clinical charts reflected non-response to immunotherapy, 1 with stable disease per RECIST 1.1, and 3 with progression of disease.
