# Supplementary material for: Immune profiling of uveal melanoma identifies a potential signature associated with response to immunotherapy
Source: PubMed Central journal article supplement — J Immunother Cancer. 2020 Nov 17;8(2):e000960. doi: 10.1136/jitc-2020-000960 (PMC7674090; doi:10.1136/jitc-2020-000960), 2020-11-17
Supplement: jitc-2020-000960supp004.pdf [file jitc-2020-000960supp004.pdf]

Supplementary Table S4. NanoString Gene List

| Gene Name |        |        |         |        |        |         |          |                           |         |        |         |          |           |          |         |
|-----------|--------|--------|---------|--------|--------|---------|----------|---------------------------|---------|--------|---------|----------|-----------|----------|---------|
| A2M       | C4BPA  | CD160  | CD80    | CTCFL  | F12    | HMGB1   | IL17B    | IRAK4                     | LBP     | MEFV   | PLA2G1B | SERPINB2 | THBS1     | TREM1    | TUBB    |
| ABC1      | C5     | CD163  | CD81    | CTLA4  | F13A1  | HRAS    | IL17F    | IRF1                      | LCK     | MERTK  | PLA2G6  | SERPING1 | THY1      | TREM2    | USP39   |
| ABL1      | C6     | CD164  | CD83    | CTSG   | F2RL1  | HSD11B1 | IL17RA   | IRF2                      | LCN2    | MFGE8  | PLAU    | SH2B2    | TICAM1    | TTK      | ZC3H14  |
| ADA       | C7     | CD180  | CD84    | CTSH   | FADD   | ICAM1   | IL17RB   | IRF3                      | LCP1    | MICA   | PLAUR   | SH2D1A   | TICAM2    | TXK      | ZKSCANS |
| ADORA2A   | C8A    | CD19   | CD86    | CTSL   | FAS    | ICAM2   | IL18     | IRF4                      | LGALS3  | MICB   | PMCH    | SH2D1B   | TIGIT     | TXNIP    | ZNF143  |
| AICDA     | C8B    | CD1A   | CD8A    | CTSS   | FCER1A | ICAM3   | IL18R1   | IRF5                      | LIF     | MIF    | PNMA1   | SIGIRR   | TIRAP     | TYK2     | ZNF346  |
| AIRE      | C8G    | CD1B   | CD8B    | CTSW   | FCER1G | ICAM4   | IL18RAP  | IRF7                      | LILRA1  | MME    | POU2AF1 | SIGLEC1  | TLR1      | UBC      |         |
| AKT3      | C9     | CD1C   | CD9     | CX3CL1 | FCER2  | ICOS    | IL19     | IRF8                      | LILRA4  | MNX1   | POU2F2  | SLAMF1   | TLR10     | ULBP2    |         |
| ALCAM     | CAMP   | CD1D   | CD96    | CX3CR1 | FCGR1A | ICOSLG  | IL1A     | IRGM                      | LILRA5  | MPPED1 | PPARG   | SLAMF6   | TLR2      | USP9Y    |         |
| AMBIP     | CARD11 | CD1E   | CD97    | CXCL1  | FCGR2A | IDO1    | IL1B     | ISG15                     | LILRB1  | MR1    | PPBP    | SLAMF7   | TLR3      | VCAM1    |         |
| AMICA1    | CARD9  | CD2    | CD99    | CXCL10 | FCGR2B | IFI16   | IL1R1    | ISG20                     | LILRB2  | MRC1   | PRAME   | SLC11A1  | TLR4      | VEGFA    |         |
| ANP32B    | CASP1  | CD200  | CDH1    | CXCL11 | FCGR3A | IFI27   | IL1R2    | ITCH                      | LILRB3  | MS4A1  | PRF1    |          | TLR5      | VEGFC    |         |
| ANXA1     | CASP10 | CD207  | CDH5    | CXCL12 | FEZ1   | IFI35   | IL1RAP   | ITGA1                     | LRP1    | MS4A2  | PRG2    | SMAD2    | TLR6      | XCL2     |         |
| APOE      | CASP3  | CD209  | CDK1    | CXCL13 | FLT3   | IFIH1   | IL1RAPL2 | ITGA2                     | LRRN3   | MSR1   | PRKCD   | SMAD3    | TLR7      | XCR1     |         |
| APP       | CASP8  | CD22   | CDKN1A  | CXCL14 | FLT3LG | IFIT1   | IL1RL1   | ITGA2B                    | LTA     | MST1R  | PRKCE   | SMPD3    | TLR8      | YTHDF2   |         |
| ARG1      | CCL1   | CD24   | CEACAM1 | CXCL16 | FN1    | IFIT2   | IL1RL2   | ITGA4                     | LTB     | MUC1   | PRM1    | SOCS1    | TLR9      | ZAP70    |         |
| ARG2      | CCL11  | CD244  | CEACAM6 | CXCL2  | FOS    | IFITM1  | IL1RN    | ITGA5                     | LTBR    | MX1    | PSEN1   | SPA17    | TMEFF2    | ZNF205   |         |
| ATF1      | CCL13  | CD247  | CEACAM8 | CXCL3  | FOXJ1  | IFITM2  | IL2      | ITGA6                     | LTF     | MYD88  | PSEN2   | SPACA3   | TNF       | ABCF1    |         |
| ATF2      | CCL14  | CD27   | CEBPB   | CXCL5  | FOXP3  | IFNA1   | IL21     | ITGAE                     | LTK     | NCAM1  | PSMB10  | SPANXB1  | TNFAIP3   | AGK      |         |
| ATG10     | CCL15  | CD274  | CFB     | CXCL6  | FPR2   | IFNA17  | IL21R    | ITGAL                     | LY86    | NCF4   | PSMB7   | SPINK5   | TNFRSF10B | ALAS1    |         |
| ATG12     | CCL16  | CD276  | CFD     | CXCL9  | FUT5   | IFNA2   | IL22     | ITGAM                     | LY9     | NCR1   | PSMB8   | SPN      | TNFRSF10C | AMMECR1L |         |
| ATG16L1   | CCL17  | CD28   | CFI     | CXCR1  | FUT7   | IFNA7   | IL22RA1  | ITGAX                     | LY96    | NEFL   | PSMB9   | SPO11    | TNFRSF11A | CC2D1B   |         |
| ATG5      | CCL18  | CD33   | CFP     | CXCR2  | FYN    | IFNA8   | IL22RA2  | ITGB1                     | LYN     | NFATC1 | PSMD7   | SPP1     | TNFRSF11B | CNOT10   |         |
| ATG7      | CCL19  | CD34   | CHIT1   | CXCR3  | GAGE1  | IFNAR1  | IL23A    | ITGB2                     | MAF     | NFATC2 | PTGDR2  | SSX1     | TNFRSF12A | CNOT4    |         |
| ATM       | CCL2   | CD36   | CHUK    | CXCR4  | GATA3  | IFNAR2  | IL23R    | ITGB3                     | MAGEA1  | NFATC3 | PTGS2   | SSX4     | TNFRSF13B | COG7     |         |
| AXL       | CCL20  | CD37   | CKLF    | CXCR5  | GNLV   | IFNB1   | IL24     | ITGB4                     | MAGEA12 | NFATC4 | PTPRC   | ST6GAL1  | TNFRSF13C | DDX50    |         |
| BAGE      | CCL21  | CD38   | CLEC4A  | CXCR6  | GPI    | IFNG    | IL25     | ITK                       | MAGEA3  | NFKB1  | PVR     | STAT1    | TNFRSF14  | DHX16    |         |
| BATF      | CCL22  | CD3D   | CLEC4C  | CYBB   | GTF3C1 | IFNGR1  | IL26     | JAK1                      | MAGEA4  | NFKB2  | PYCARD  | STAT2    | TNFRSF17  | DNAJC14  |         |
| BAX       | CCL23  | CD3E   | CLEC5A  | CYFIP2 | GZMA   | IFNL1   | IL27     | JAK2                      | MAGEB2  | NFKBIA | RAG1    | STAT3    | TNFRSF18  | EDC3     |         |
| BCL10     | CCL24  | CD3EAP | CLEC6A  | CYLD   | GZMB   | IFNL2   | IL2RA    | JAK3                      | MAGEC1  | NLR5   | REL     | STAT4    | TNFRSF1A  | EIF2B4   |         |
| BCL2      | CCL25  | CD3G   | CLEC7A  | DDX43  | GZMH   | IGF1R   | IL2RB    | JAM3                      | MAGEC2  | NLRP3  | RELA    | STAT5B   | TNFRSF1B  | ERCC3    |         |
| BCL2L1    | CCL26  | CD4    | CLU     | DDX58  | GZMK   | IGF2R   | IL2RG    | KIR3DL1                   | MAP2K1  | NOD1   | RELB    | STAT6    | TNFRSF4   | FCF1     |         |
| BCL6      | CCL27  | CD40   | CMA1    | DEFB1  | GZMM   | IGLL1   | IL3      | KIR3DL2                   | MAP2K2  | NOD2   | REPS1   | SYCP1    | TNFRSF8   | G6PD     |         |
| BID       | CCL28  | CD40LG | CMKLR1  | DMBT1  | HAMP   | IKKBK   | IL32     | KIR3DL3                   | MAP2K4  | NOS2A  | RIPK2   | SYK      | TNFRSF9   | GPATCH3  |         |
| BIRC5     | CCL3   | CD44   | COL3A1  | DOCK9  | HAVCR2 | IKBKE   | IL34     | KIR_Activating_Subgroup_1 | MAP3K1  | NOTCH1 | ROPN1   | SYT17    | TNFSF10   | GUSB     |         |
| BLK       | CCL3L1 | CD46   | COLEC12 | DPP4   | HCK    | IKBKG   | IL3RA    | KIR_Activating_Subgroup_2 | MAP3K5  | NRP1   | RORA    | TAB1     | TNFSF11   | HDAC3    |         |
| BLNK      | CCL4   | CD47   | CR1     | DUSP4  | HLA-A  | IL10    | IL4      | KIR_Inhibi                | MAP3K7  | NT5E   | RORC    | TAL1     | TNFSF12   | HPRT1    |         |

|       |       |       |        |        |          |         |        | ting_Subgroup_1           |          |          |         |       |          |         |
|-------|-------|-------|--------|--------|----------|---------|--------|---------------------------|----------|----------|---------|-------|----------|---------|
| BMI1  | CCL5  | CD48  | CR2    | DUSP6  | HLA-B    | IL10RA  | IL4R   | KIR_inhibiting_Subgroup_2 | MAP4K2   | NUP107   | RPS6    | TANK  | TNFSF13  | MRPS5   |
| BST1  | CCL7  | CD5   | CREB1  | EBI3   | HLA-C    | IL11    | IL5    | KIT                       | MAPK1    | OAS3     | RRAD    | TAP1  | TNFSF13B | MTMR14  |
| BST2  | CCL8  | CD53  | CREB5  | ECSIT  | HLA-DMA  | IL11RA  | IL5RA  | KLRB1                     | MAPK11   | OSM      | RUNX1   | TAP2  | TNFSF14  | NOL7    |
| BTK   | CCND3 | CD55  | CREBBP | EGR1   | HLA-DMB  | IL12A   | IL6    | KLRC1                     | MAPK14   | PASD1    | RUNX3   | TAPBP | TNFSF15  | NUBP1   |
| BTLA  | CCR1  | CD58  | CRP    | EGR2   | HLA-DOB  | IL12B   | IL6R   | KLRC2                     | MAPK3    | PAX5     | S100A12 | TARP  | TNFSF18  | POLR2A  |
| C1QA  | CCR2  | CD59  | CSF1   | ELANE  | HLA-DPA1 | IL12RB1 | IL6ST  | KLRD1                     | MAPK8    | PBK      | S100A7  | TBK1  | TNFSF4   | PPIA    |
| C1QB  | CCR3  | CD6   | CSF1R  | ELK1   | HLA-DPB1 | IL12RB2 | IL7    | KLRF1                     | MAPKAPK2 | PDCD1    | S100A8  | TBX21 | TNFSF8   | PRPF38A |
| C1QBP | CCR4  | CD63  | CSF2   | ENG    | HLA-DQA1 | IL13    | IL7R   | KLRG1                     | MARCO    | PDCD1LG2 | S100B   | TCF7  | TOLLIP   | SAP130  |
| C1R   | CCR5  | CD68  | CSF2RB | ENTPD1 | HLA-DQB1 | IL13RA1 | IL8    | KLRK1                     | MASP1    | PDGFC    | SAA1    | TFE3  | TP53     | SDHA    |
| C1S   | CCR6  | CD7   | CSF3   | EOMES  | HLA-DRA  | IL13RA2 | IL9    | LAG3                      | MASP2    | PDGFRB   | SBNO2   | TFEB  | TPSAB1   | SF3A3   |
| C2    | CCR7  | CD70  | CSF3R  | EP300  | HLA-DRB3 | IL15    | ILF3   | LAIR2                     | MAVS     | PECAM1   | SELE    | TFRC  | TPTE     | TBP     |
| C3    | CCR9  | CD74  | CT45A1 | EPCAM  | HLA-DRB4 | IL15RA  | INPP5D | LAMP1                     | MBL2     | PIK3CD   | SELL    | TGFB1 | TRAF2    | TLK2    |
| C3AR1 | CCRL2 | CD79A | CTAG1B | ETS1   | HLA-E    | IL16    | IRAK1  | LAMP2                     | MCAM     | PIK3CG   | SELPLG  | TGFB2 | TRAF3    | TMUB2   |
| C4B   | CD14  | CD79B | CTAGE1 | EWSR1  | HLA-G    | IL17A   | IRAK2  | LAMP3                     | MEF2C    | PIN1     | SEMG1   | THBD  | TRAF6    | TRIM39  |
