# Supplementary material for: Immune profiling of uveal melanoma identifies a potential signature associated with response to immunotherapy
Source: PubMed Central journal article supplement — J Immunother Cancer. 2020 Nov 17;8(2):e000960. doi: 10.1136/jitc-2020-000960 (PMC7674090; doi:10.1136/jitc-2020-000960), 2020-11-17
Supplement: jitc-2020-000960supp005.pdf [file jitc-2020-000960supp005.pdf]

## Figure S1

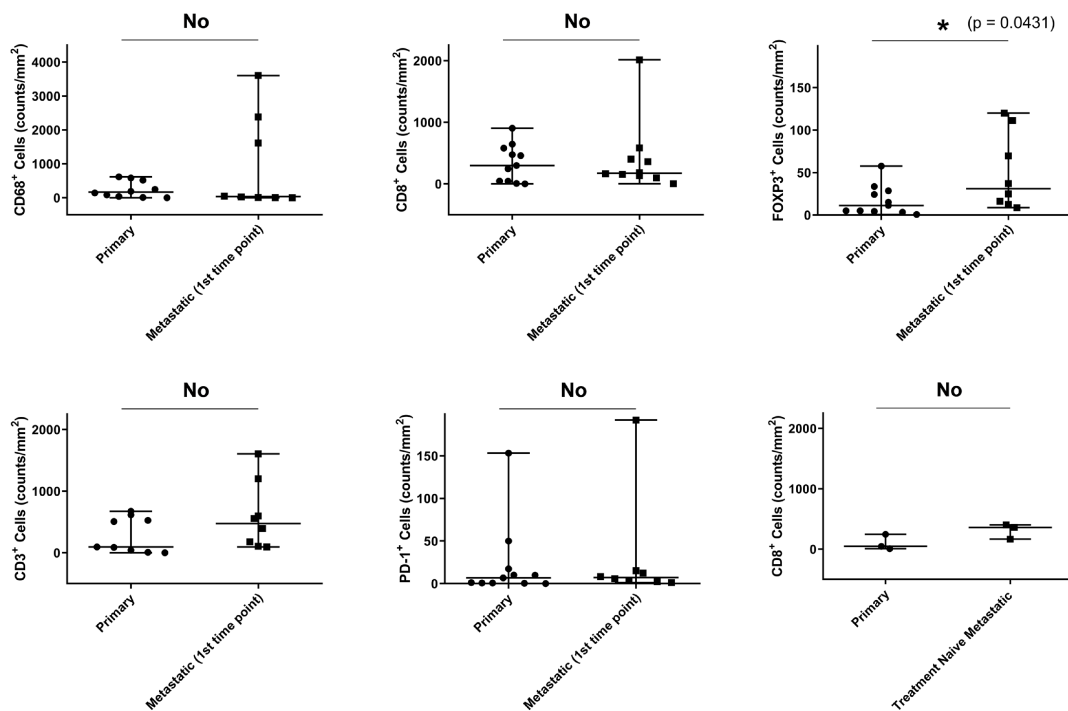

**Figure S1.** Quantification of immune infiltrates in matching primary and metastatic UM tumors from the same patients. There were 11 patients with matching primary and metastatic tumors. 3 of the metastases were treatment-naïve samples, with incomplete IHC data due to exhaustion of the FFPE. The other 8 metastases were collected at various time points after a variety of treatments (immunotherapy, targeted therapy, and liver directed therapy), also with incomplete IHC data due to tissue exhaustion. No difference was seen in levels of CD3+, CD8+, CD4+, CD68+, PD-1+, other than metastatic tissues have higher FoxP3+ infiltrates than primary tumor from the same patient. \* = p<0.05. No = not significant.
