# Supplementary material for: Immune profiling of uveal melanoma identifies a potential signature associated with response to immunotherapy
Source: PubMed Central journal article supplement — J Immunother Cancer. 2020 Nov 17;8(2):e000960. doi: 10.1136/jitc-2020-000960 (PMC7674090; doi:10.1136/jitc-2020-000960), 2020-11-17
Supplement: jitc-2020-000960supp006.pdf [file jitc-2020-000960supp006.pdf]

Figure S2

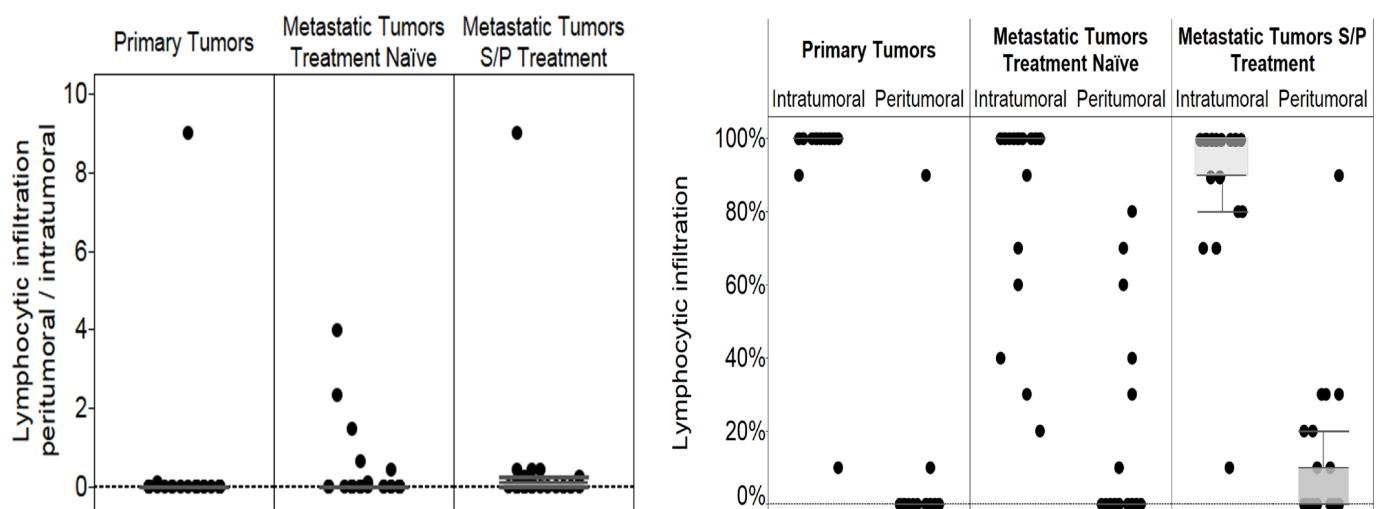

**Figure S2. Quantification of the levels of intratumoral and peritumoral CD8+ infiltrates in primary tumors, treatment-naïve metastatic tumors, and on-treatment metastatic tumors. Top panel shows the peritumoral/intratumoral ratio, while the bottom panel displays the data as percentages.**
