# Supplementary material for: Immune profiling of uveal melanoma identifies a potential signature associated with response to immunotherapy
Source: PubMed Central journal article supplement — J Immunother Cancer. 2020 Nov 17;8(2):e000960. doi: 10.1136/jitc-2020-000960 (PMC7674090; doi:10.1136/jitc-2020-000960), 2020-11-17
Supplement: jitc-2020-000960supp008.pdf [file jitc-2020-000960supp008.pdf]

**Supplementary Table S5. PD-L1 expression levels in primary and metastatic uveal melanoma.**

| Primary Uveal Melanoma |                                           | Treatment Naïve Metastatic Uveal Melanoma |                                           |
|------------------------|-------------------------------------------|-------------------------------------------|-------------------------------------------|
| Patient Number         | PD-L1 (positive staining of tumor cells%) | Patient Number                            | PD-L1 (positive staining of tumor cells%) |
| 1                      | 0                                         | A2                                        | 0                                         |
| 2                      | 0                                         | A3                                        | 0                                         |
| 3                      | 0                                         | A4                                        | 0                                         |
| 4                      | 0                                         | A5                                        | 0                                         |
| 5                      | 0                                         | A6                                        | 0                                         |
| 6                      | 0                                         | A7                                        | 0                                         |
| 7                      | 0                                         | A8                                        | 0                                         |
| 8                      | 0                                         | A9                                        | 0                                         |
| 9                      | 0                                         | A10                                       | 0                                         |
| 10                     | <1%                                       | A11                                       | 0                                         |
| 11                     | <1%                                       | A12                                       | 0                                         |
| 12                     | 0                                         | A13                                       | 0                                         |
| 13                     | <1%                                       | A14                                       | 0                                         |
|                        | <1%                                       | A15                                       | 0                                         |
| 14                     | 0                                         | A16                                       | 0                                         |
| 15                     | 0.06                                      | A17                                       | 0                                         |
| 16                     | 0                                         | A18                                       | 0                                         |
| 17                     | <1%                                       | A19                                       | 0                                         |
| 18                     | 0                                         | A20                                       | 0                                         |
| 19                     | <1%                                       | A21                                       | 0                                         |
| 20                     | <1%                                       | A22                                       | 0                                         |
| 21                     | 0                                         | A23                                       | 0                                         |
| 22                     | 0                                         | A24                                       | 0                                         |
| 23                     | 0                                         | A25                                       | 0                                         |
| 25                     | 0                                         | A26                                       | 0                                         |
| 26                     | <1%                                       | A27                                       | 0                                         |
| 27                     | NA                                        | A28                                       | 0                                         |
|                        |                                           | A29                                       | 0                                         |
|                        |                                           | A30                                       | 0                                         |

\*Patient #13 had 2 primary tumor biopsy samples and 2 treatment naïve metastatic samples. Patient 27 had 3 treatment naïve metastatic samples.
