# Supplementary figures and images for: Immune profiling of uveal melanoma identifies a potential signature associated with response to immunotherapy
Source: PubMed Central journal article supplement — J Immunother Cancer. 2020 Nov 17;8(2):e000960. doi: 10.1136/jitc-2020-000960 (PMC7674090; doi:10.1136/jitc-2020-000960), 2020-11-17

## Figure S3

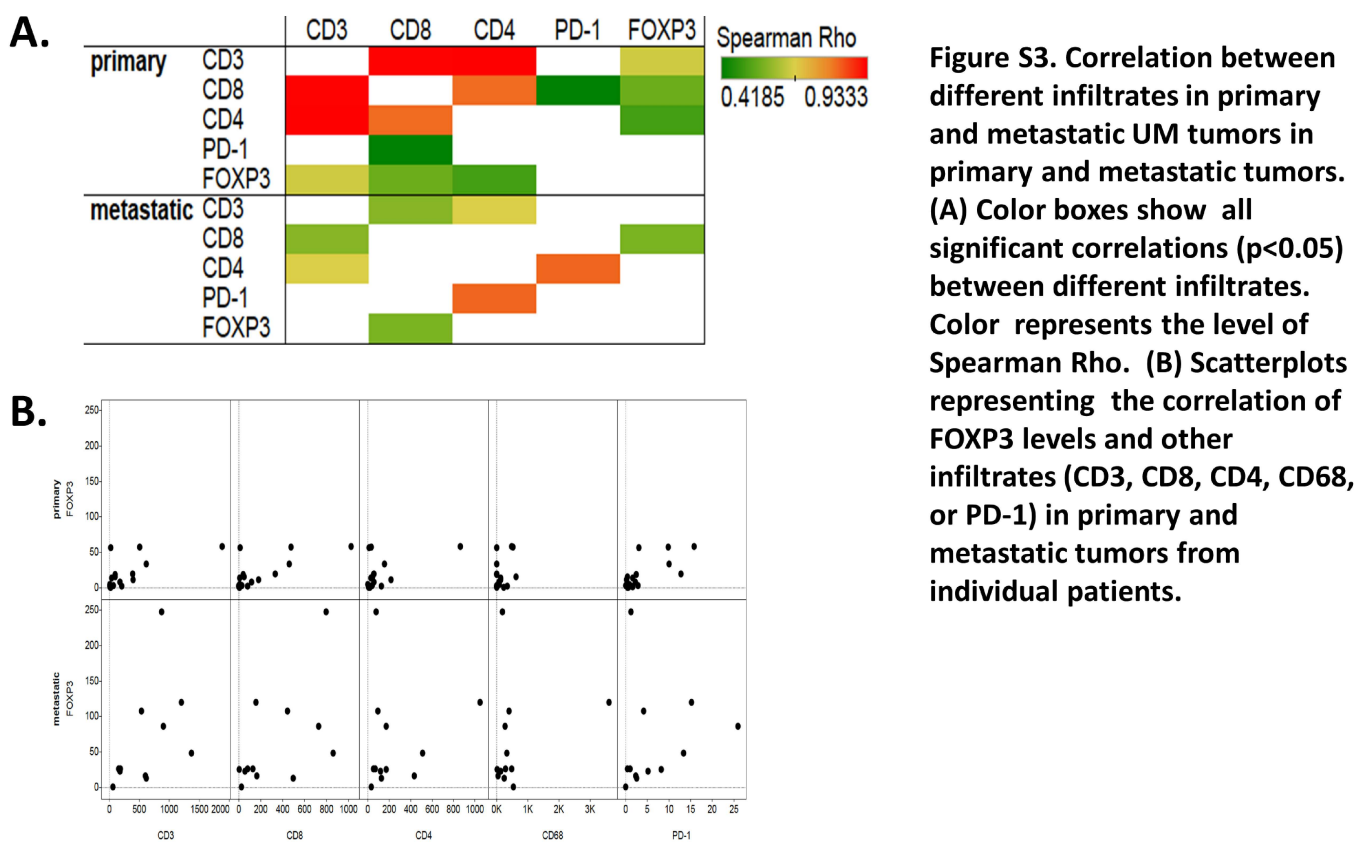

Supplement: jitc-2020-000960supp007.pdf [file jitc-2020-000960supp007.pdf]
